# Supplementary material
Source: ML conference proceedings conference paper supplement (https://openreview.net/forum?id=5atraF1tbg)
Supplement: supplementary_material [file attachment]

<https://github.com/ubc-systopia/panoramia-privacy-measurement>
